# Supplementary material for: Subcellular and regional localization of mRNA translation in midbrain dopamine neurons
Source: PubMed Central journal article supplement (PMC8844886; doi:10.1016/j.celrep.2021.110208), 2022-01-11
Supplement: NIHMS1771089-supplement-1.pdf [file NIHMS1771089-supplement-1.pdf]

**Cell Reports, Volume 38**

**Supplemental information**

**Subcellular and regional localization of mRNA  
translation in midbrain dopamine neurons**

**Benjamin D. Hobson, Linghao Kong, Maria Florencia Angelo, Ori J. Lieberman, Eugene V. Mosharov, Etienne Herzog, David Sulzer, and Peter A. Sims**

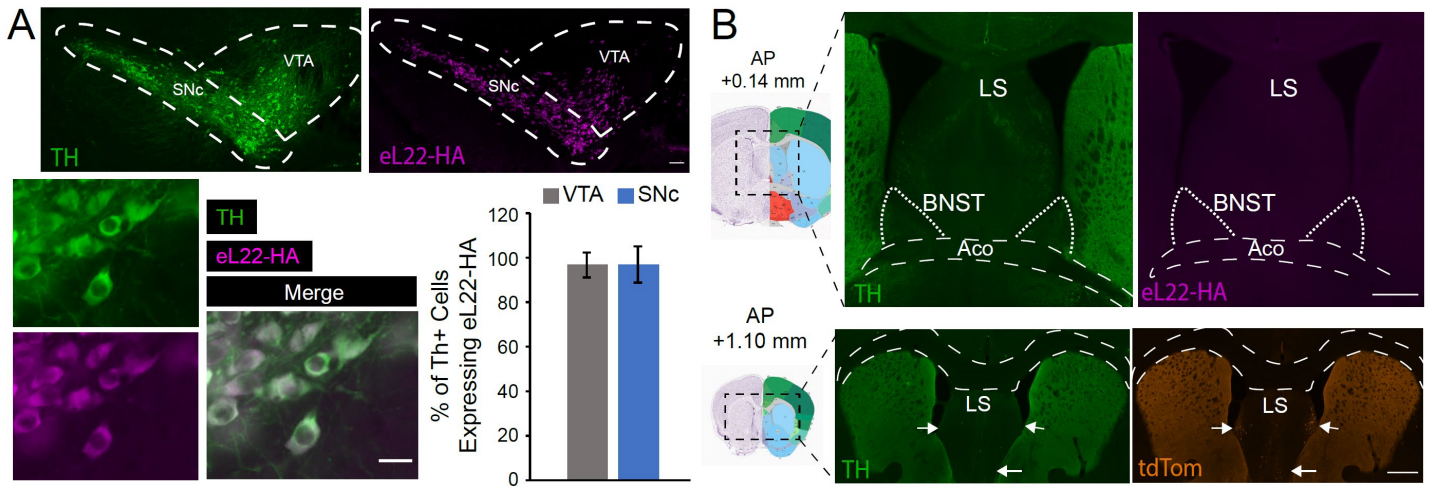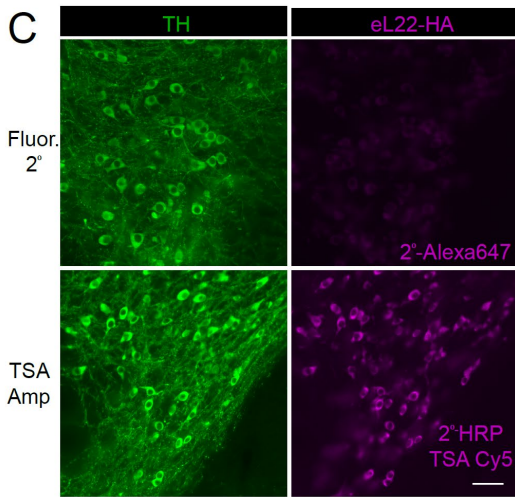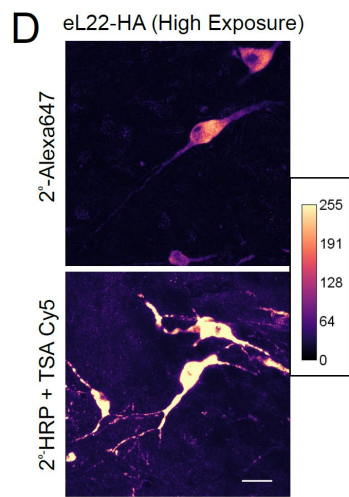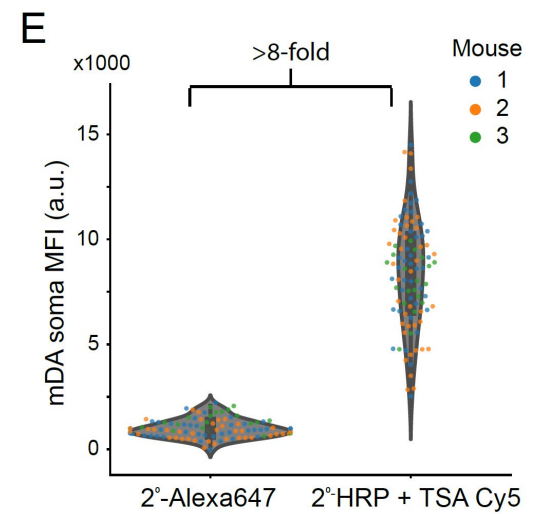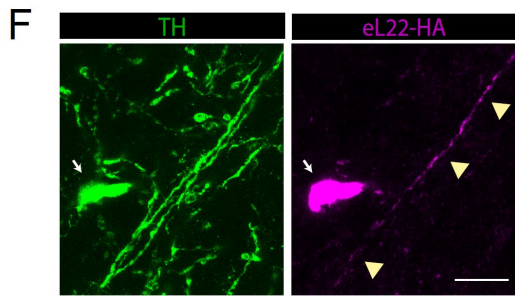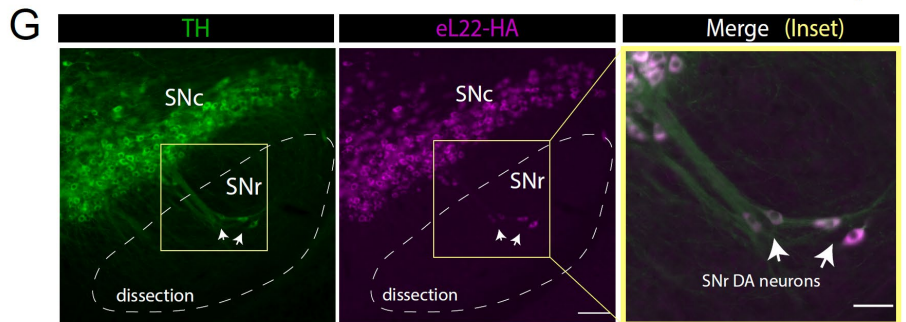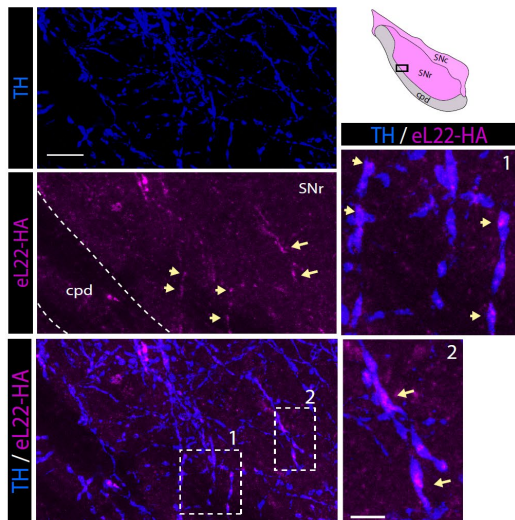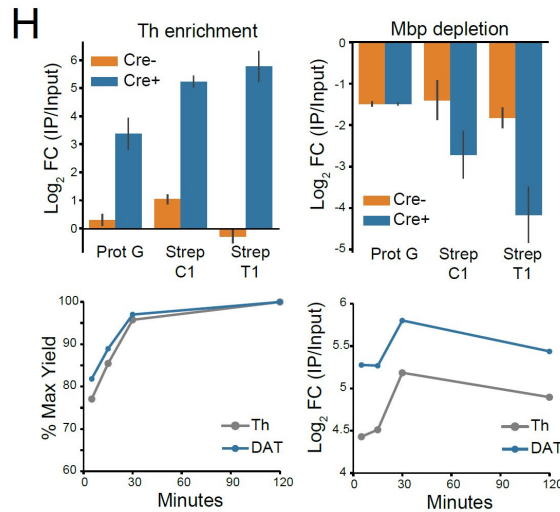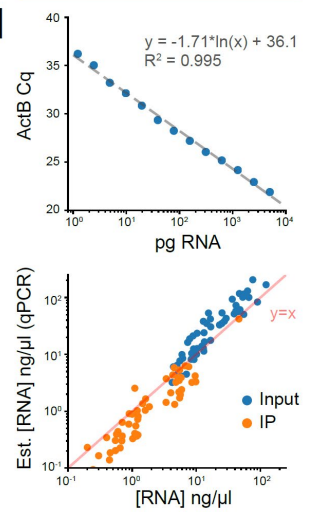

**Figure S1: Histological analysis of eL22-HA expression in DAT<sup>IRES-Cre</sup>:RiboTag mice, eL22-HA signal amplification, eL22-HA staining in distal SNr dendrites of mDA neurons, RiboTag IP optimization, and qRT-PCR estimation of RiboTag IP yield, Related to Figure 1 and Figure 2**

**(A) Upper:** Epifluorescence image of DAT<sup>IRES-Cre</sup>:RiboTag midbrain immunostained for tyrosine hydroxylase (TH) and eL22-HA. Dashed lines indicate regions used for cell counting shown below. **Lower left:** SNc of DAT<sup>IRES-Cre</sup>:RiboTag, representative of images for cell counting. Scale bar, 20  $\mu$ m. **Lower right:** % of TH<sup>+</sup> cells expressing eL22-HA at indicated ages. Data represent mean  $\pm$  standard deviation, and are derived from n=2-3 mice and n=6 fields, (VTA) n= 717 cells; (SNc) n=451 cells. Mean is >95% in both regions. Scale bar, 100  $\mu$ m.

**(B) Upper:** DAT<sup>IRES-Cre</sup>:RiboTag midbrain stained for TH and eL22-HA at the indicated coordinates. **Lower:** DAT<sup>IRES-Cre</sup>:Ai9 section stained for TH and tdTomato at indicated coordinates. Both scale bars, 500  $\mu$ m.

**(C)** Comparison of AlexaFluor647-conjugated secondary antibody vs. TSA-Cy5 + HRP-conjugated secondary antibody for eL22-HA immunostaining. Exposure was optimized to avoid saturation of soma. Scale bar, 50  $\mu$ m.

**(D)** Same as panel A, but using high exposure to detect dendritic labeling (somata are saturated for TSA-Cy5). Scale bar, 25  $\mu$ m.

**(E)** Quantification of somata eL22-HA intensity, related to panel A. Violin plot depicts n=100 soma quantified from 2-3 fields each from 3 mice.

**(F) Upper:** eL22-HA labeling in descending SNr dendrites can be distinguished from soma of SNr mDA neurons. Scale bar, 20  $\mu$ m. **Lower:** Amplified eL22-HA labeling is observed in distal SNr mDA neuronal dendrites near the cerebral peduncle. Scale bar, 15  $\mu$ m. Inset scale bar, 5  $\mu$ m.

**(G)** DAT<sup>IRES-Cre</sup>:RiboTag midbrain immunostained for TH and eL22-HA. Scale bar, 200  $\mu$ m. **Arrows:** A few scattered Th+/eL22-HA+ mDA neurons are present in the SNr. Scale bar, 50  $\mu$ m.

**(H)** Optimization of eL22-HA IP conditions. **Upper:** Cre-negative or Cre-positive ventral midbrain (n=2 each genotype) lysate was split into three equal parts for capture with Rabbit anti-HA (Protein G beads) or biotinylated Rabbit anti-HA (Streptavidin C1/T1 beads). Mean and confidence intervals are plotted. **Lower:** Further optimization of capture time using four equal parts of DAT<sup>IRES-Cre</sup>:RiboTag ventral midbrain lysate with biotinylated Rb anti-HA and Streptavidin T1 beads. Antibody was incubated with polysome lysates overnight, and beads were added for the capture time indicated.

**(I) Upper:** qRT-PCR of beta-Actin (ActB) with total RNA input amounts (measured by Qubit) ranging from 1 pg – 5 ng. **Lower:** qRT-PCR (ActB) estimation of RNA concentration (measured by Qubit for Input samples, or RNA Pico bioanalyzer for IP samples, n=40-48 each).

**Abbreviations:** SNc, Substantia nigra pars compacta; SNr, Substantia nigra parts reticulata; VTA, Ventral tegmental area, Aco, Anterior commissure; LS, Lateral septum; BNST, Bed nucleus of the stria terminalis, TSA; tyramide signal amplification, HRP; horseradish peroxidase, cpd; cerebral peduncle, Th; tyrosine hydroxylase, Mbp; myelin basic protein, DAT; dopamine transporter, ActB; beta-actin.

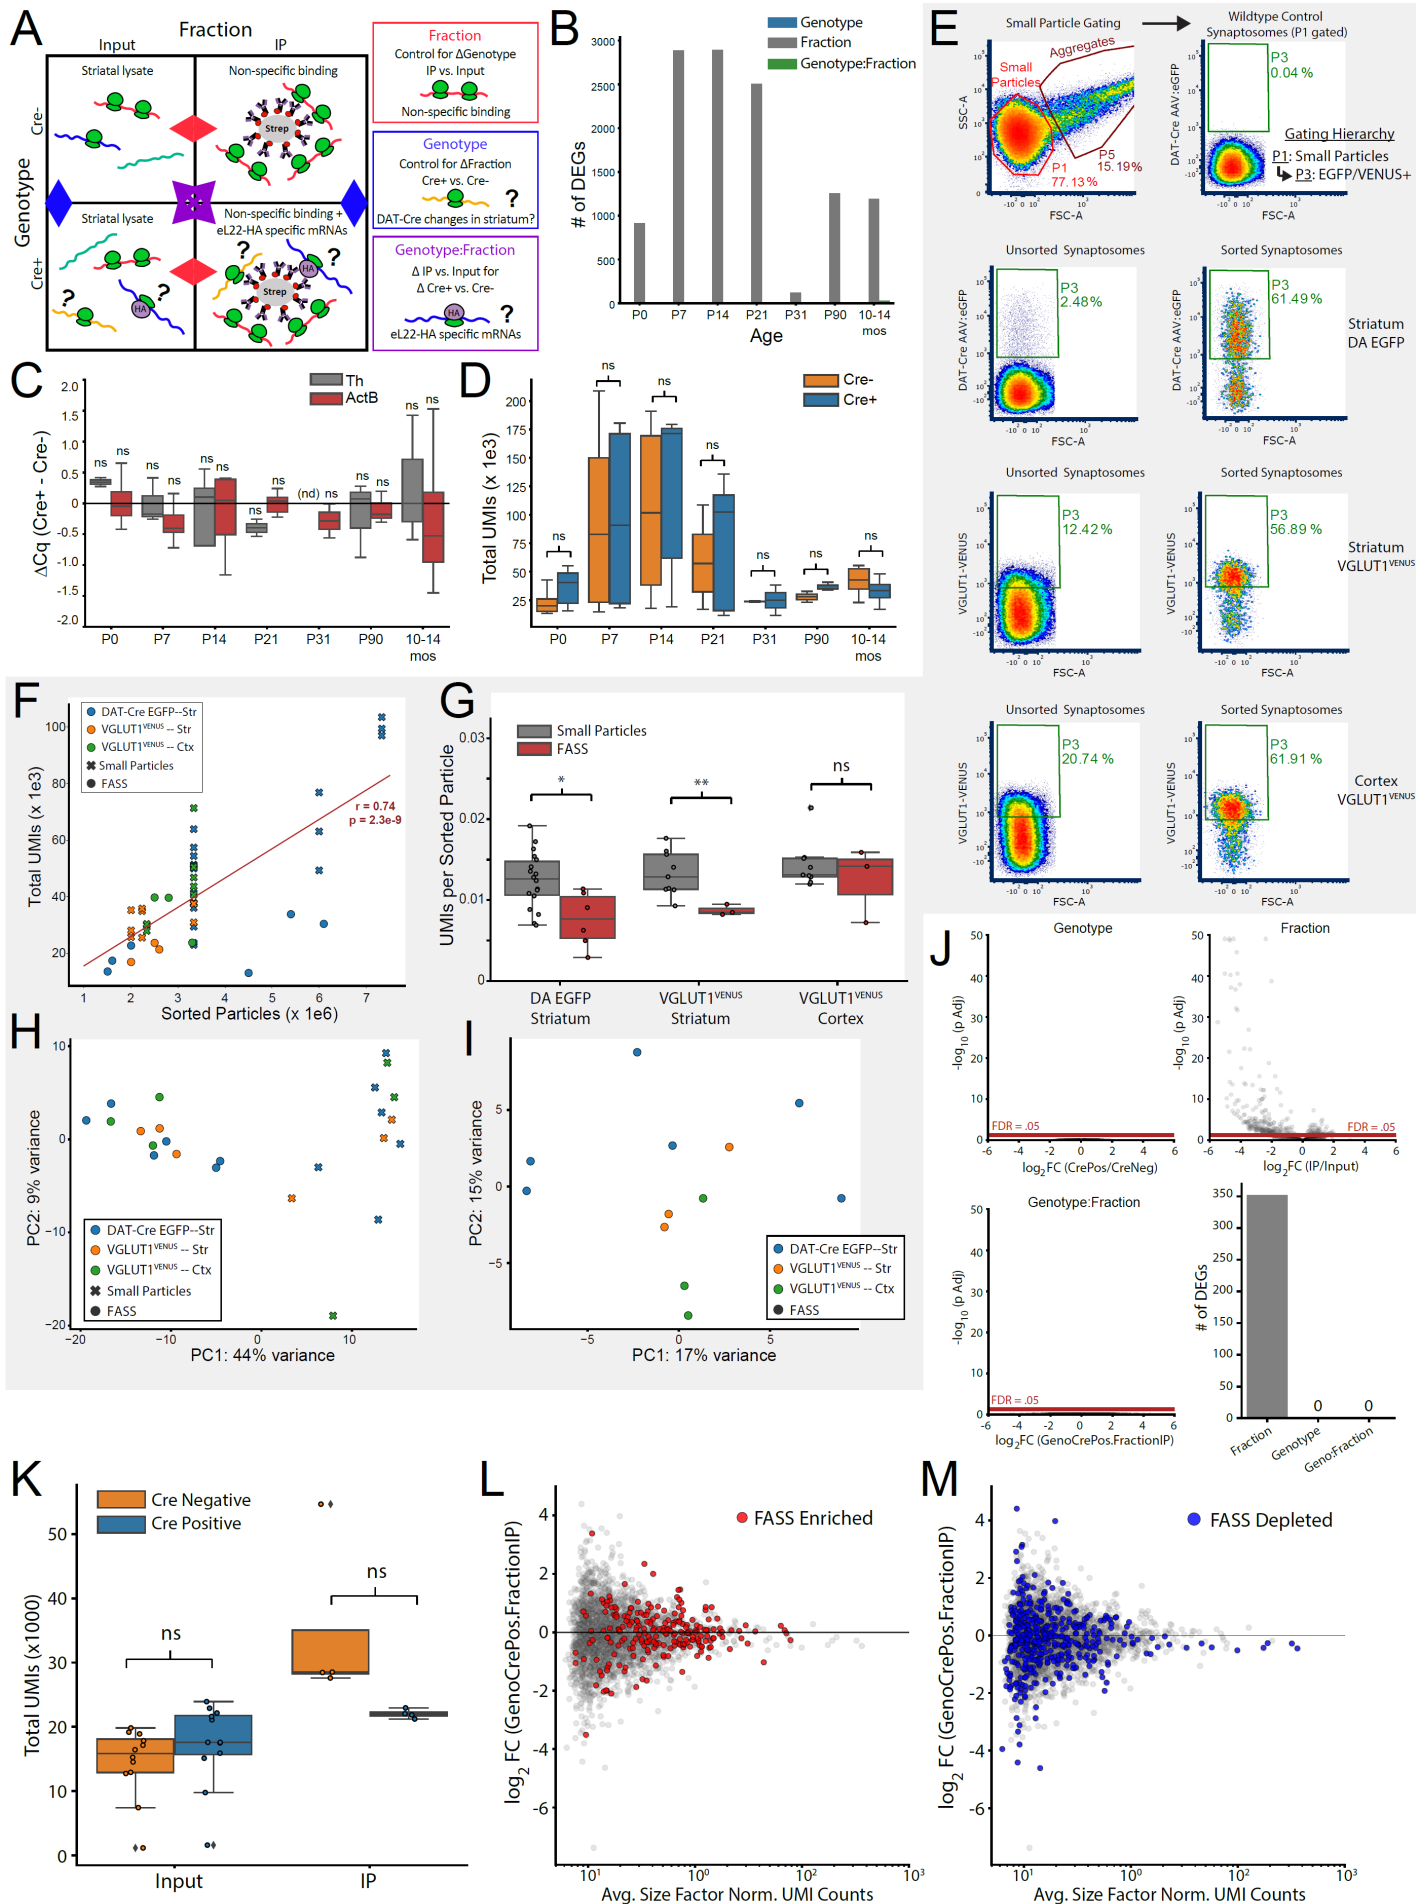

**Figure S2: RNA-Seq analysis of bulk striatal and striatal synaptosome RiboTag IP samples, VGLUT1<sup>VENUS</sup> and DA:EGFP FASS Gating, and RNA-Seq analysis of FASS samples, Related to Figure 3**

**(A)** Schematic depicting generalized linear model analysis of striatal RiboTag IP using the *DESeq2* likelihood ratio test (LRT). Analogous to a 2-way analysis of variance, the main effects of each factor and the interaction between them are each tested for statistical significance across all genes (with FDR correction). See **Methods**.

**(B)** Number of genes meeting statistical significance (FDR < 0.05) in the *DESeq2* LRT with the indicated terms omitted from the following reduced model:  $\sim genotype + fraction + genotype: fraction$ . In addition to testing each age was independently (*shown here*), the effects of *age*, *fraction*, *genotype*, and *fraction: genotype* interaction were also on the entire dataset across all ages (see **Figure 3A-B**). In contrast to the genotype-independent effect of *fraction* (non-specific binding), the effects of *genotype* and *genotype: fraction* interaction were negligible at all ages. See **Supplementary File 5** for complete summary of *DESeq2* analysis. Mice per age and genotype: (P0, Cre-) n= 6, (P0, Cre+) n=6, (P7, Cre-) n=6, (P7, Cre+) n=6, (P14, Cre-) n=6, (P14, Cre+) n=6, (P21, Cre-) n=6, (P21, Cre+) n=7, (P31, Cre-) n=2, (P31, Cre+) n=2, (P90, Cre-) n=2, (P90, Cre+) n=3, (10-14 mo., Cre-) n=6, (10-14 mo., Cre+) n=4, where each n indicates an IP and corresponding Input sample.

**(C)** qRT-PCR measurement of *Th* and *ActB* mRNA yield in striatal RiboTag IPs from Cre-negative and Cre-positive mice. The difference between the average Cq values (Cre-positive Cq – Cre-negative Cq) is plotted at each age. Mice per age and genotype are the same as in panel B. nd: not detectable, ns: all comparisons are not significant ( $p > 0.05$ ), Welch's unequal variance t-test.

**(D)** Total UMIs per sample for striatal RiboTag IPs from Cre-negative and Cre-positive mice. Mice per age and genotype are the same as in panel B. ns: all comparisons are not significant ( $p > 0.05$ ), Welch's unequal variance t-test.

**(E)** Density plots of Fluorescence-Activated Synaptosome Sorting (FASS) gating strategy. Upper: Particles are first selected from the 'P1' gate on forward and side scatter in order to avoid aggregates. Synaptosomes from wildtype controls are used to set a fluorescence threshold on which to sort VGLUT1<sup>VENUS</sup> and DA:EGFP particles. Lower: Representative density plots of Unsorted (*left*) and Sorted (*right*) synaptosomes from the indicated regions and genotypes.

**(F)** Number of sorted particles vs. total UMIs for the indicated sorted samples (n=6 striatum DA:EGFP, n=3 striatum VGLUT1<sup>VENUS</sup>, n=3 cortex VGLUT1<sup>VENUS</sup>, where each n represents both a FASS sample and three corresponding small particle samples). Pearson's  $r = 0.74$ ,  $p = 2.3e-09$ .

**(G)** Total UMIs per sorted particle for small particle and FASS samples as indicated. \* indicates  $p < 0.05$ , \*\* indicates  $p < 0.01$ , Welch's unequal variance t-test. Samples are the same as shown in panel F.

**(H)** PCA of *DESeq2* *rlog* normalized UMI counts for FASS and small particle samples. Samples are the same as shown in panel F, but small particle technical replicates (n=3 per FASS sample) were collapsed.

**(I)** Same as panel H, but only FASS samples are included in the PCA. See **Supplementary File 6** for complete summary of *DESeq2* testing.

**(J)** Upper and lower left: Volcano plots are derived from the *DESeq2* LRT, with the indicated terms removed from the following two-factor GLM:  $\sim genotype + fraction + genotype: fraction$ . Lower right: Number of differentially expressed genes (DEGs, FDR < 0.05) from the *DESeq2* LRT test for the indicated factors, related to panel A. See **Supplementary File 8** for complete summary of *DESeq2* testing.

**(K)** Total UMIs for Input and IP samples from striatal synaptosome RiboTag IPs (n = 12 each genotype for Input, n = 4 each genotype for IP). ns indicates  $p > 0.05$ , Welch's unequal variance t-test.

**(L-M)** log<sub>2</sub> fold change vs. abundance (MA) plot for FASS-enriched or FASS-depleted genes shown in **Figure 3G**. Log<sub>2</sub>(GenoCrePos.FractionIP) represents the difference in the *fraction* effect between genotypes: { Cre-positive log<sub>2</sub>FC(IP/Input) – Cre-negative log<sub>2</sub>FC(IP/Input) }.

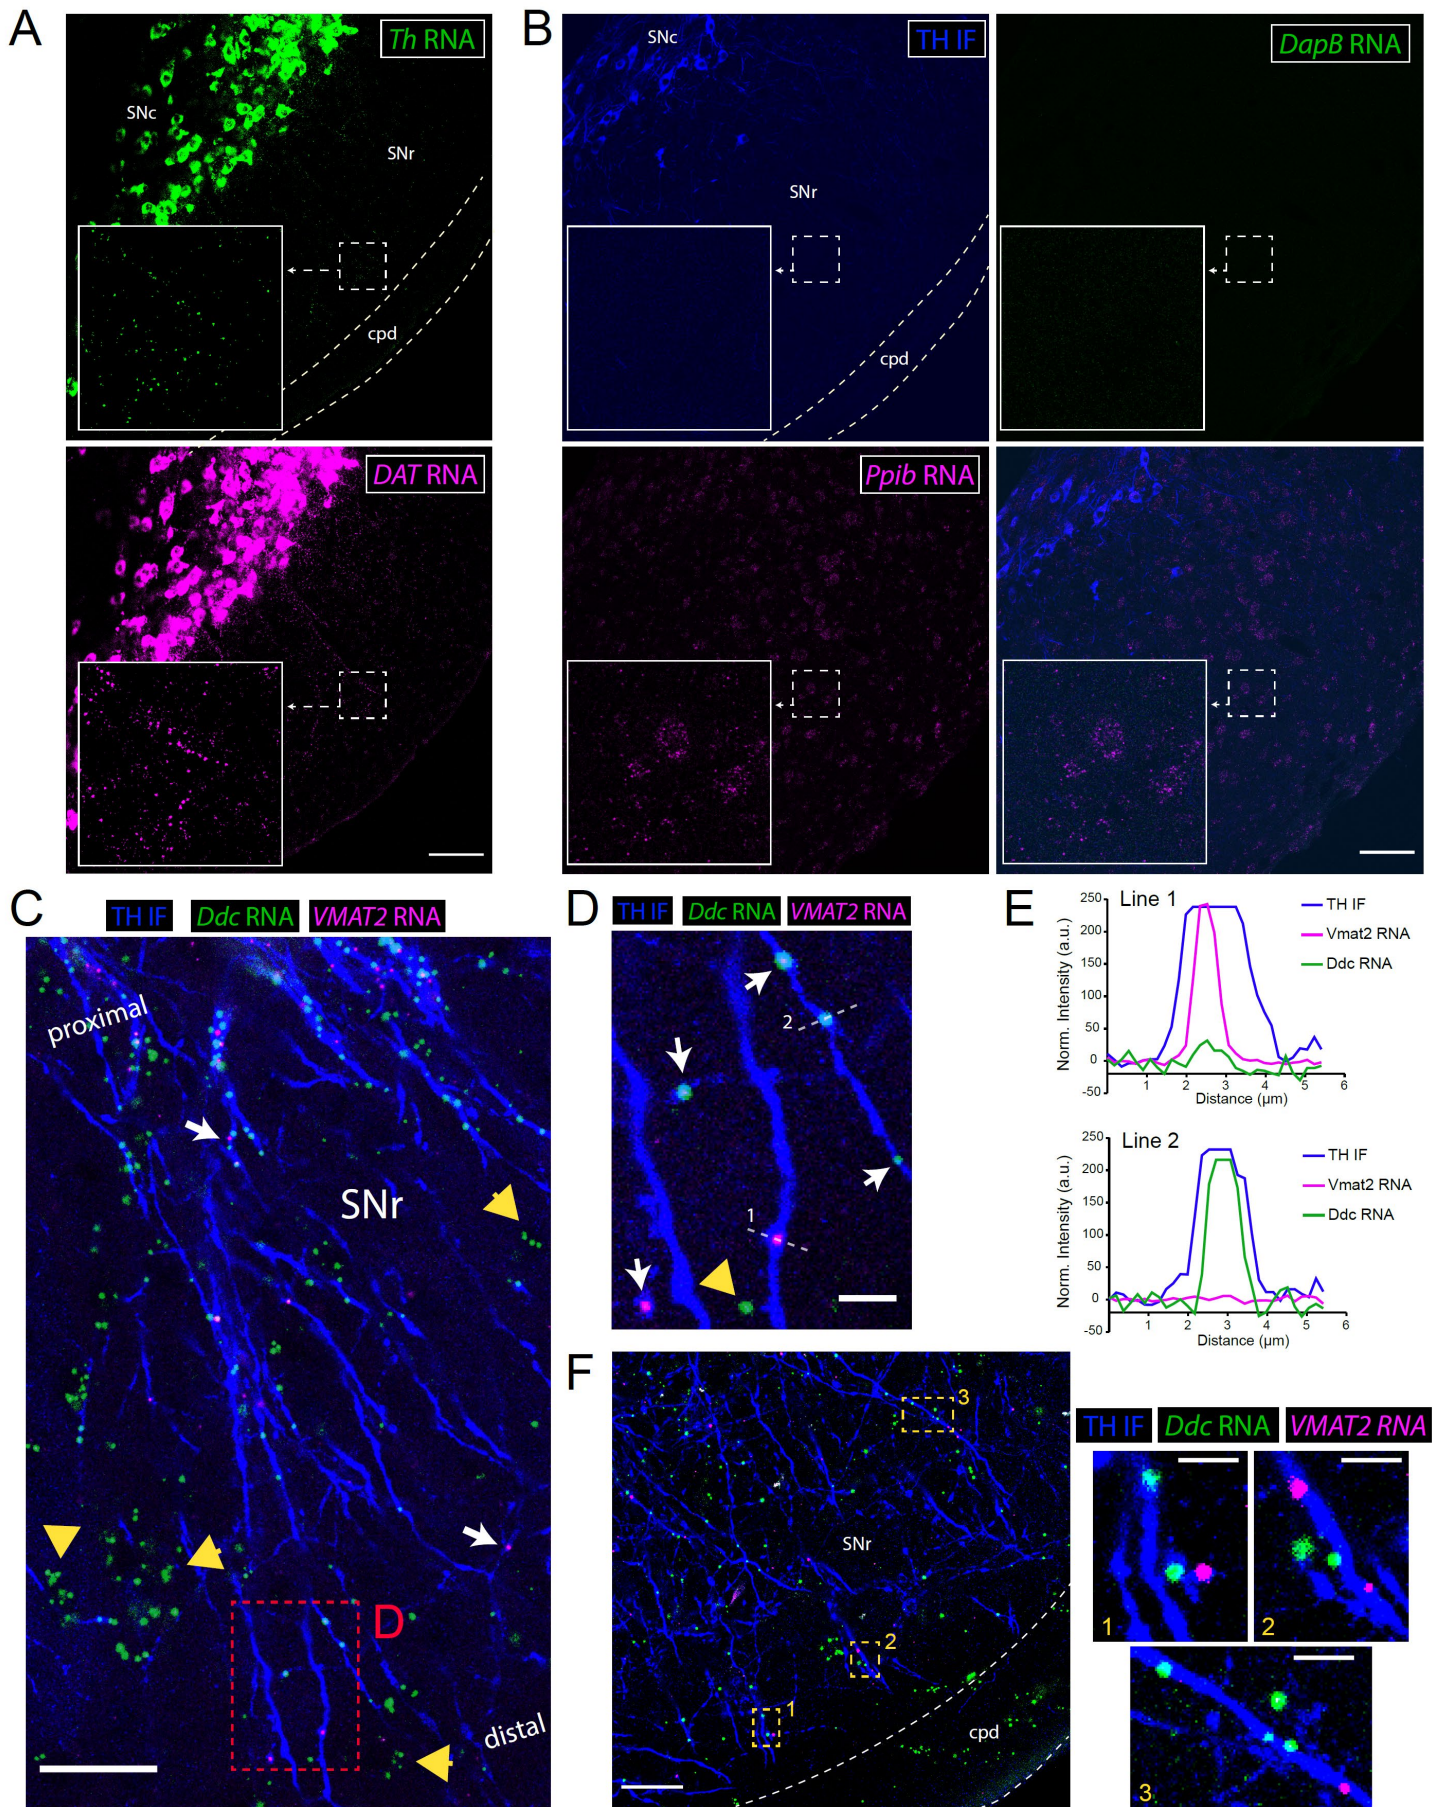

**Figure S3: Midbrain FISH for dopaminergic and control mRNAs, *Ddc* and *Slc18a2/Vmat2* mRNA in TH<sup>+</sup> SNr dendrites, Related to Figure 4**

**(A)** Multicolor fluorescence *in situ* hybridization (FISH, RNAScope assay) for *Th* and *Slc6a3/DAT* mRNA in the substantia nigra. Scale bar, 100  $\mu$ m.

**(B)** TH immunostaining combined with multicolor FISH for the negative control (bacterial) mRNA *DapB* and positive control mRNA *Ppib*. Scale bar, 100  $\mu$ m.

**(C)** TH immunostaining combined with multicolor FISH for *Ddc* and *Slc18a2/Vmat2* mRNA in the SNr. Yellow large arrowheads indicate clusters of *Ddc* mRNA outside of TH<sup>+</sup> dendrites. White arrows indicate *Slc18a2/Vmat2* mRNA within TH<sup>+</sup> dendrites. Red dashed lines indicate the inset in panel D. Scale bar, 25  $\mu$ m.

**(D)** Inset corresponding to red dashed lines in panel C. Yellow large arrowhead indicates a *Ddc* mRNA puncta outside of TH<sup>+</sup> dendrites. White arrows indicate *Ddc* and *Slc18a2/Vmat2* mRNA within TH<sup>+</sup> dendrites. White dashed lines correspond to the intensity profiles shown below in panel E. Scale bar, 5  $\mu$ m.

**(E)** Intensity profiles for all three fluorescent channels, corresponding to the lines indicated above in panel D.

**(F)** Left: TH immunostaining combined with multicolor FISH for *Ddc* and *Slc18a2/Vmat2* mRNA in the distal SNr near the cerebral peduncle (cpd). Yellow dashed lines indicate the insets shown on the right. Scale bar, 25  $\mu$ m. Right: Insets of *Ddc* and *Slc18a2/Vmat2* mRNA in TH<sup>+</sup> dendrites. Scale bars, 5  $\mu$ m.

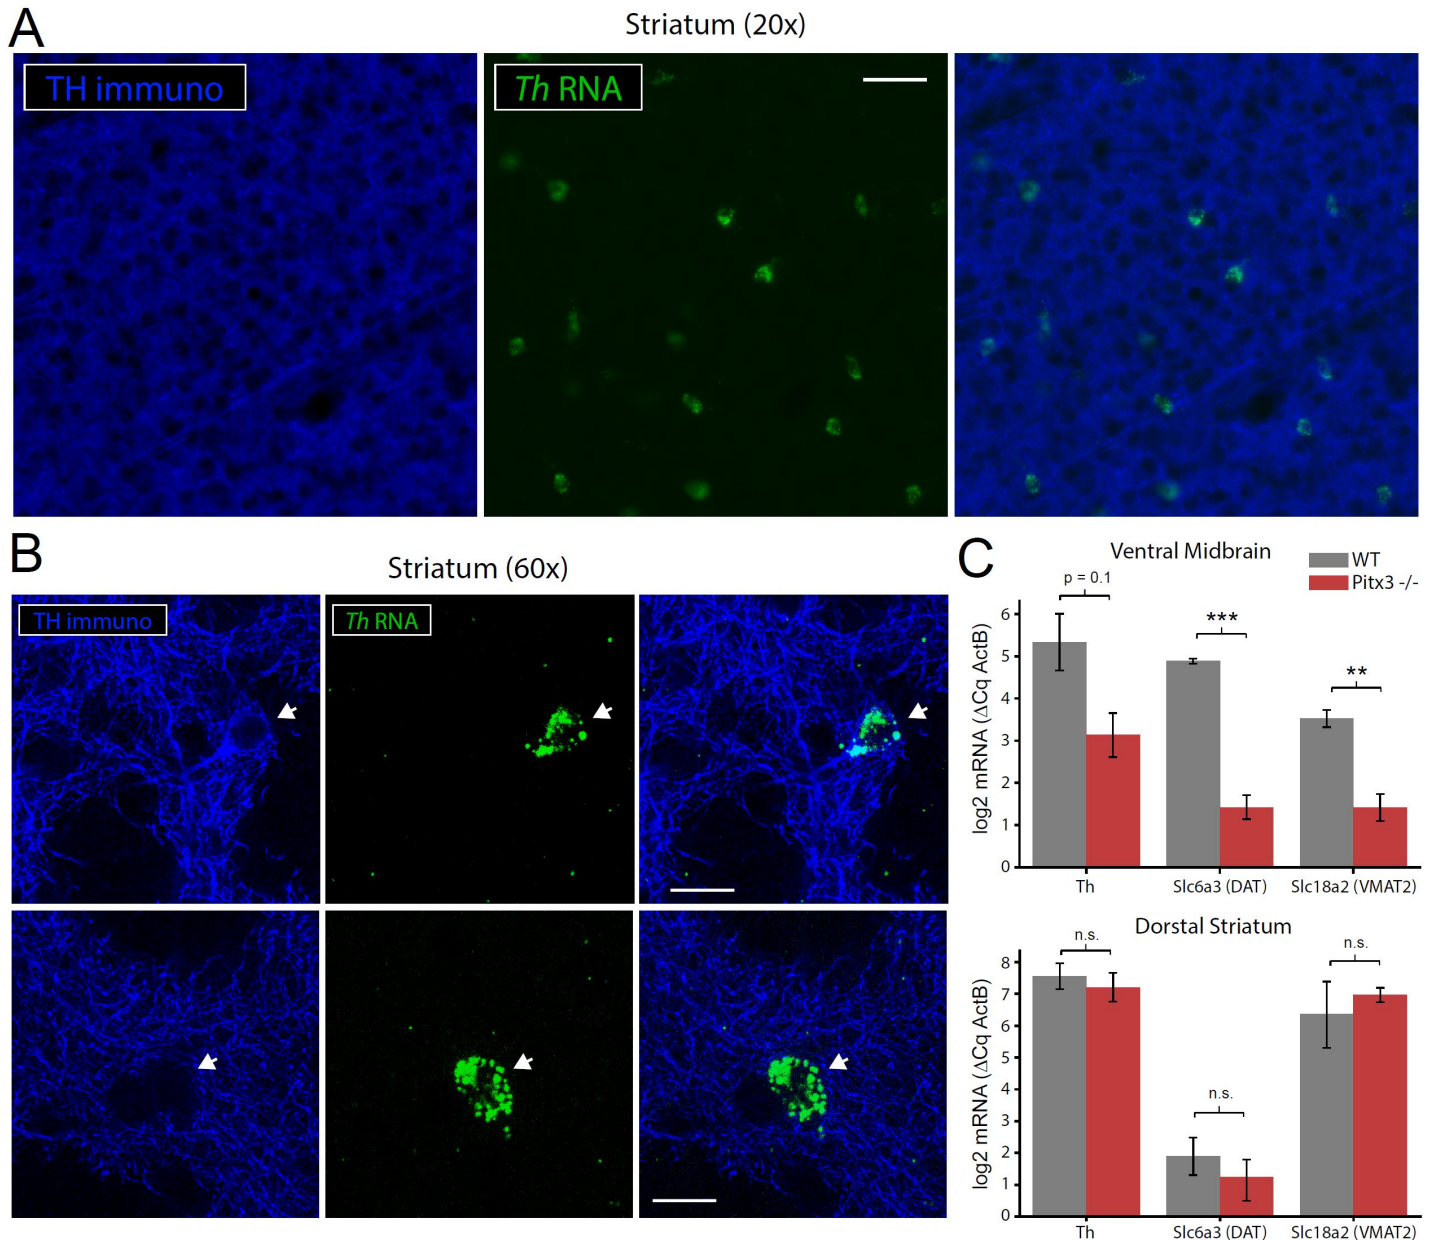

**Figure S4: *Th* mRNA<sup>+</sup> striatal neurons, not dopaminergic axons, are the source of *Th* mRNA in the striatum, Related to Figure 4**

**(A)** TH immunostaining combined with FISH for *Th* mRNA in the striatum. Scale bar, 50  $\mu$ m.

**(B)** TH immunostaining combined with FISH for *Th* mRNA in the striatum. Occasionally, some *Th* mRNA<sup>+</sup> neurons also display TH immunoreactivity (*upper*). Typically, they do not (*lower*). Scale bars, 15  $\mu$ m.

**(C)** qRT-PCR of the indicated dopaminergic mRNAs in the Ventral Midbrain (*upper*) or dorsal striatum (*lower*) of Wildtype (n=3) and Pitx3<sup>-/-</sup> mice (n=4). \*\* indicates p < 0.01, \*\*\* indicates p < 0.001, Welch's unequal variance t-test.



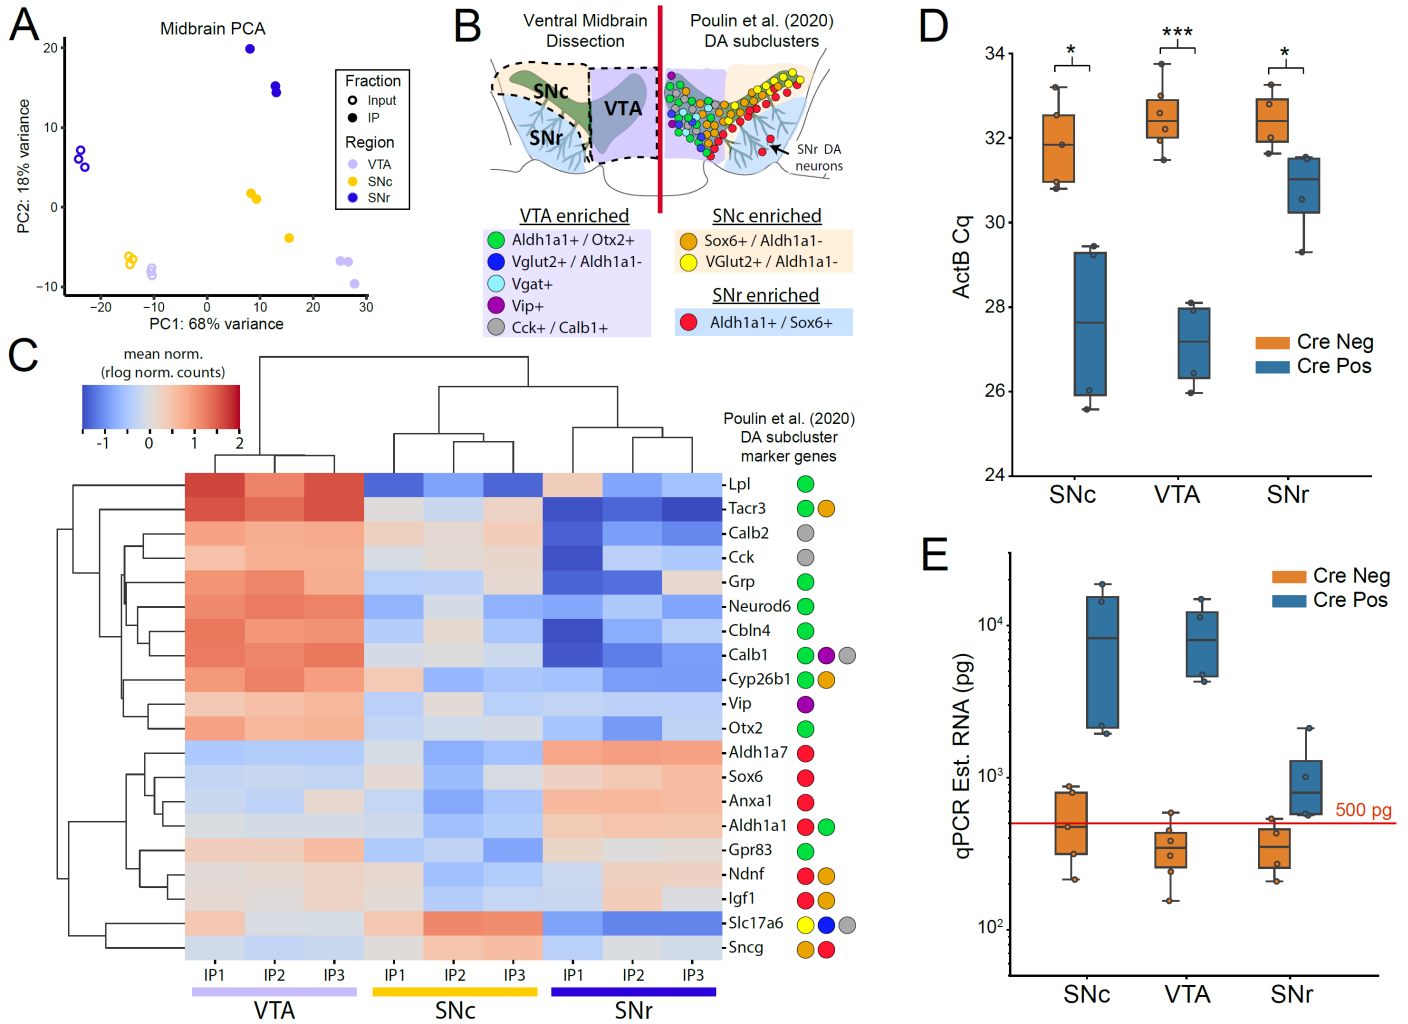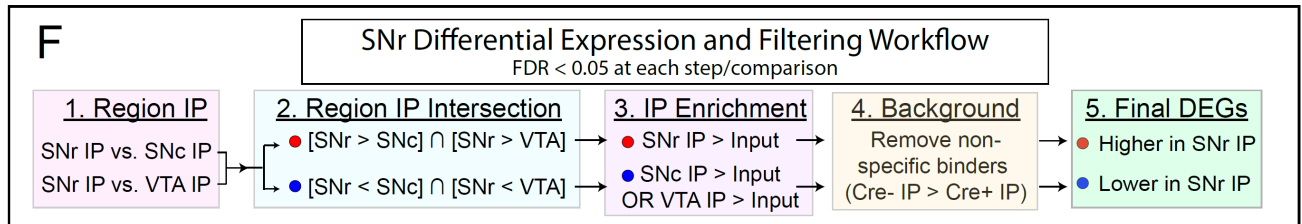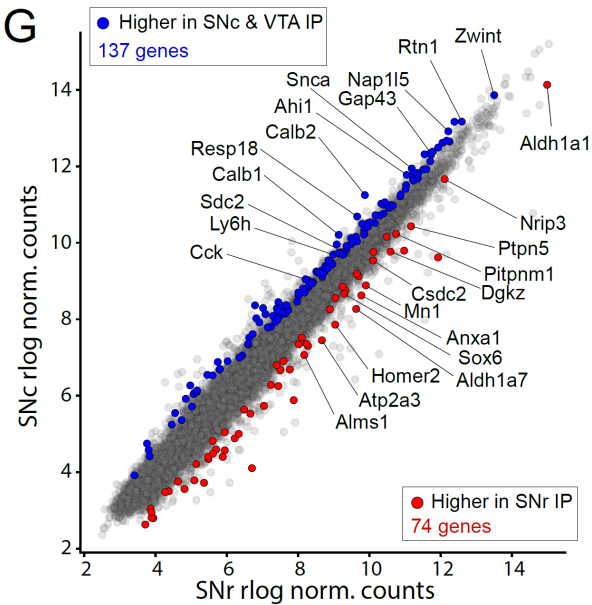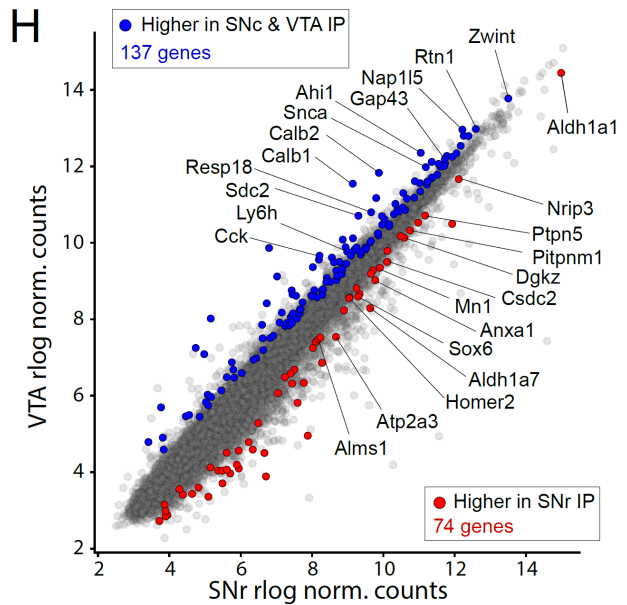

**Figure S5: RiboTag IP from midbrain dissections recapitulates mDA neuronal heterogeneity, qRT-PCR estimated yield of midbrain RiboTag IPs, SNr RiboTag IP Filtering, and Enrichment of *Aldh1a1*<sup>+</sup>/*Sox6*<sup>+</sup> mDA neuronal markers, Related to Figure 5**

**(A)** PCA of RiboTag IP and Input samples from VTA, SNc, and SNr dissections.

**(B)** Schematic depicting anatomical dissections and the anatomical distribution of mDA neuronal clusters described by Poulin et al. (2020).

**(C)** Clustered heatmap of *DESeq2* *rlog* normalized counts, mean-normalized within each gene, for the indicated VTA, SNc, and SNr RiboTag IPs (n=3 each). The twenty genes shown are strong markers for specific mDA neuronal clusters as shown in panel B and in Poulin et al. (2020).

**(D)** beta-Actin (ActB) Cq values for Cre-negative and Cre-positive RiboTag IPs in the indicated regions (n=4 each region/genotype). \* indicates  $p < 0.05$ , \*\*\* indicates  $p < 0.001$ , Welch's unequal variance t-test.

**(E)** Estimated total RNA (picograms) based on ActB Cq values. Red line indicates 500 picograms.

**(F)** Schematic depicting filtering and comparison of SNr RiboTag IP to VTA and SNc RiboTag IPs (FDR < 0.05 at each step). First, DEGs in SNr vs. SNc and in SNr vs. VTA comparisons are identified. Second, the intersection of SNr-enriched or SNr-depleted genes (relative to SNc/VTA) from these two DEG lists is retained. Third, only genes enriched in SNr IP vs. Input or SNc/VTA IP vs. Input comparisons are retained. Fourth, genes that are significantly higher in Cre-negative IP samples compared to Cre-positive IP samples are removed (non-specific binders). The final list of DEGs includes genes enriched (red) or depleted (blue) in SNr RiboTag IPs relative to SNc and VTA RiboTag IPs. See **Supplementary File 9** for complete summary of DEGs and filtering.

**(G-H)** Log-log plots depicting the average *DESeq2* *rlog* normalized counts for SNr RiboTag IPs (x-axis) and SNc (*left*) or VTA (*right*) RiboTag IPs (y-axis). DEGs corresponding to panel F are labeled in blue or red, with select genes labeled.

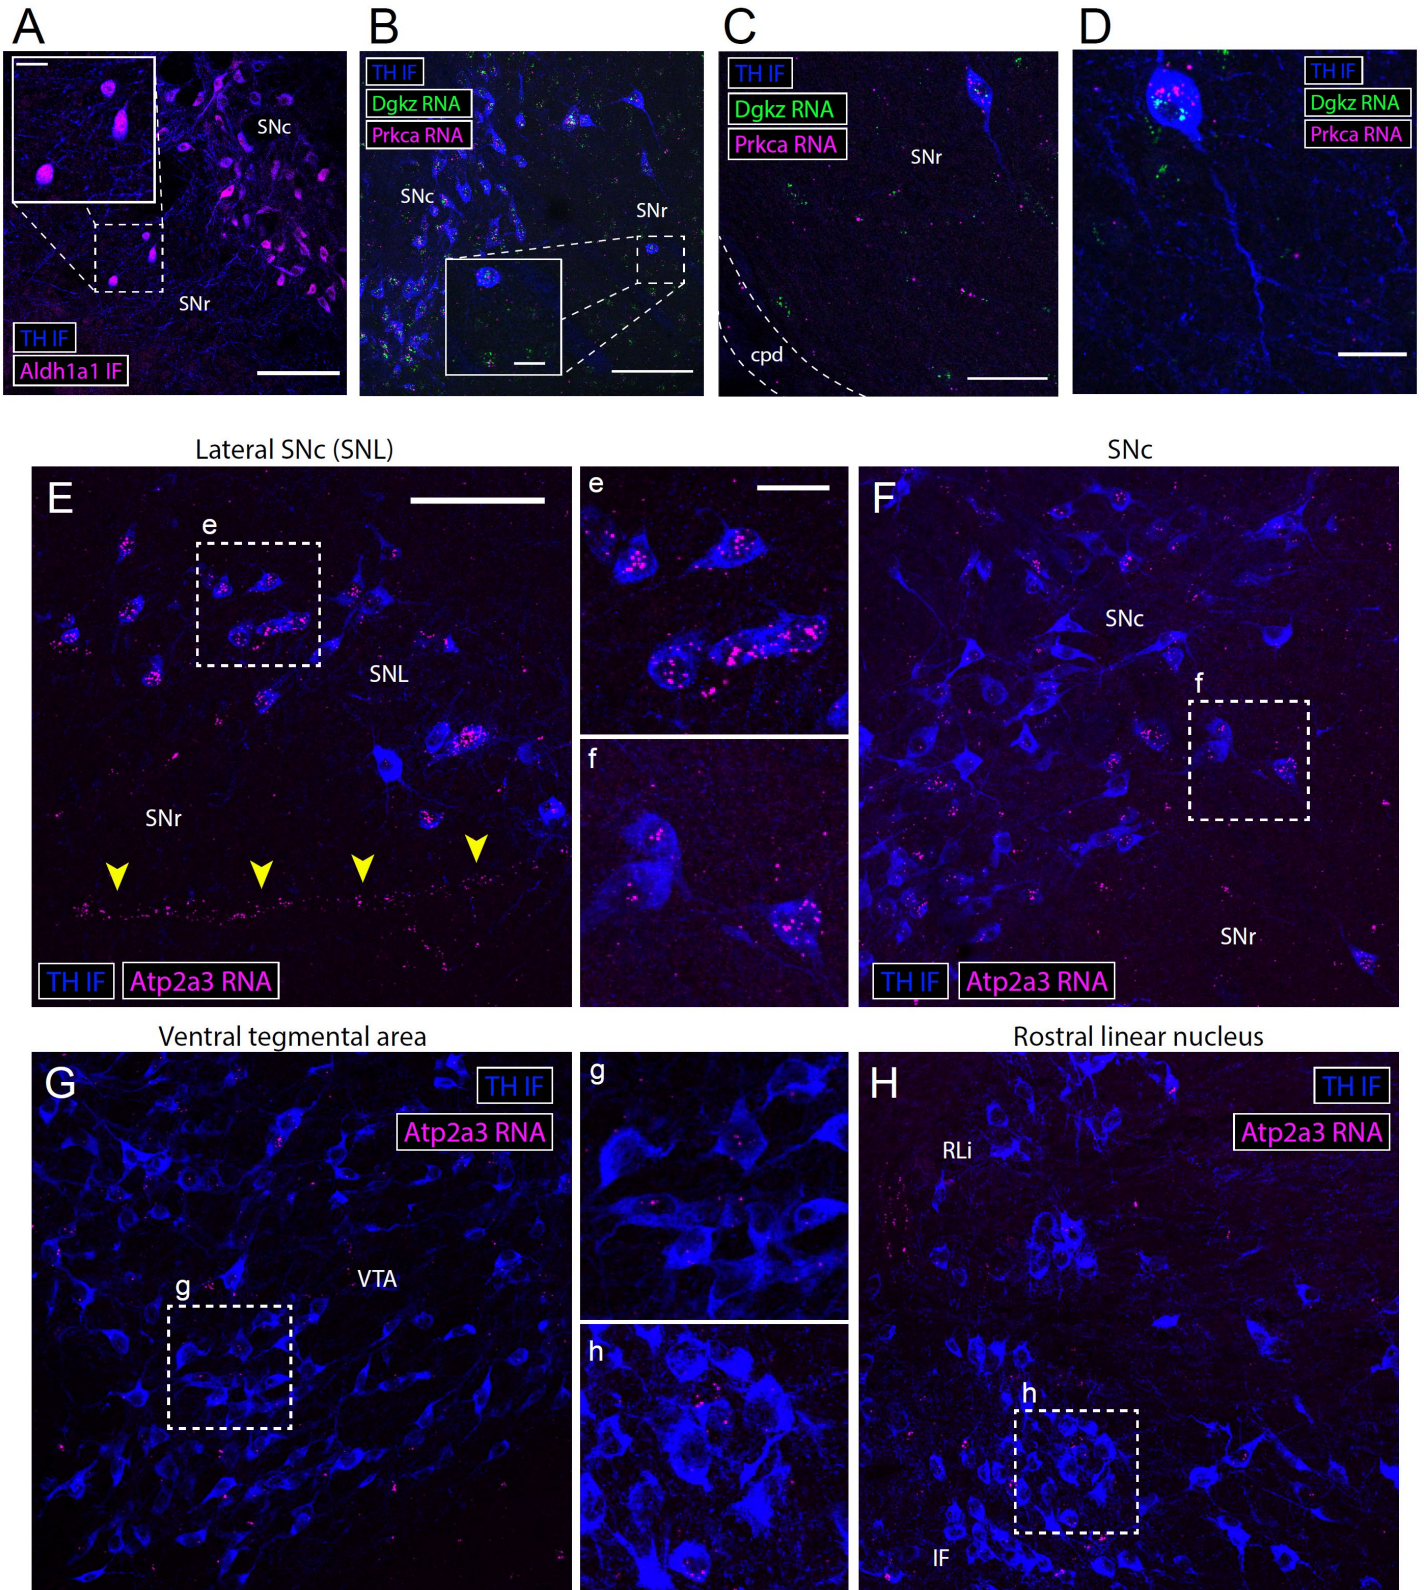

**Figure S6: SNr RiboTag IP-enriched mRNAs localized within SNr mDA somata and heterogeneous expression of *Atp2a3* (SERCA3) in mDA neurons, Related to Figure 5**

(A) Immunostaining for TH and Aldh1a1 reveals Aldh1a1<sup>+</sup> mDA neurons within the SNr. Scale bar, 100 μm. Inset scale bar, 20 μm.

(B-D) TH immunostaining combined with multicolor FISH for *Dgkz* and *Prkca* mRNA in the proximal and distal SNr. Both of these SNr RiboTag IP-enriched mRNAs are localized within the soma of mDA neurons in the SNr,

and are not distributed in dopaminergic dendrites. **(B)** Scale bar, 100  $\mu\text{m}$ . Inset scale bar, 20  $\mu\text{m}$ . **(C)** Scale bar, 50  $\mu\text{m}$ . **(D)** Scale bar, 20  $\mu\text{m}$ .

**(E-H)** TH immunostaining combined with FISH for *Atp2a3/SERCA3* mRNA in the indicated regions. Dashed white lines indicate the insets shown in the center (e-h). Yellow arrowheads in **(E)** indicate prominent labeling of blood vessels, likely within endothelial cells which are known to express SERCA3. Scale bar, 100  $\mu\text{m}$ . Inset scale bar, 25  $\mu\text{m}$ . See **Figure 5G** for quantification within each region.

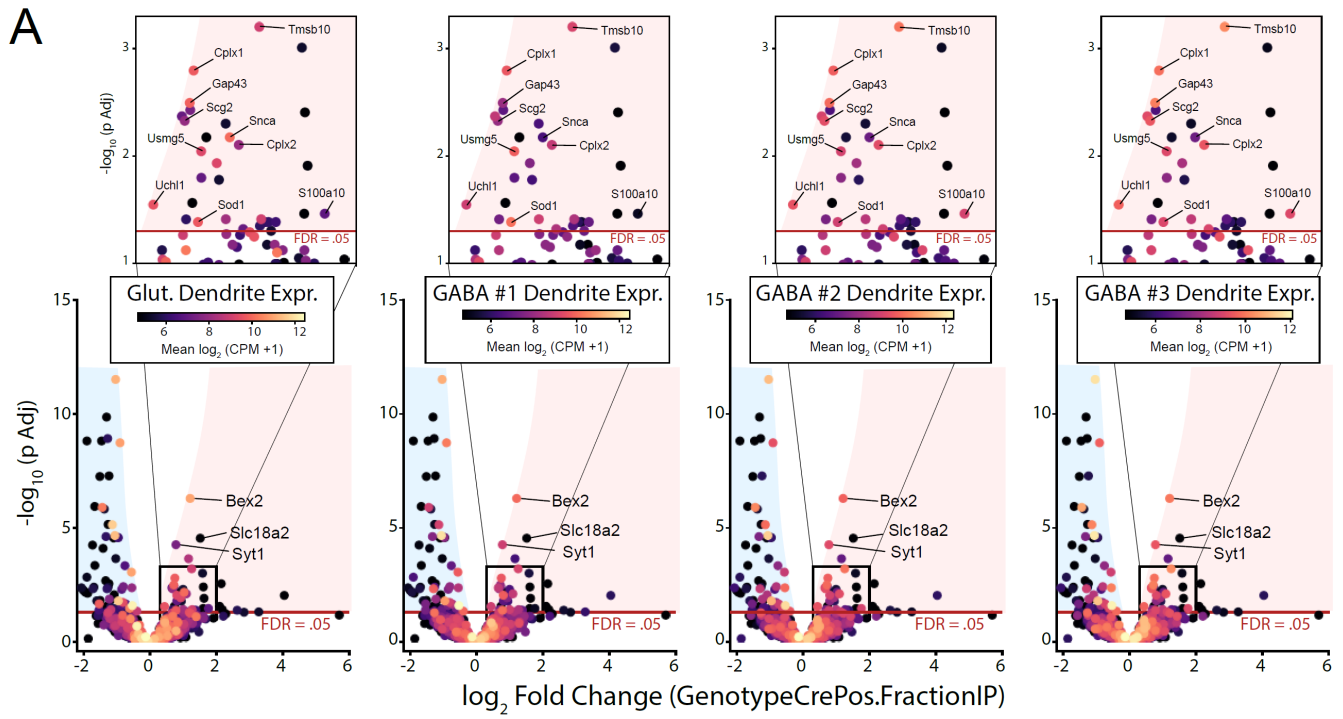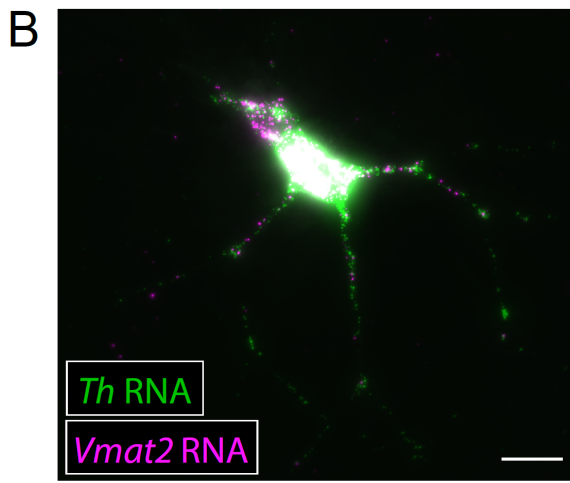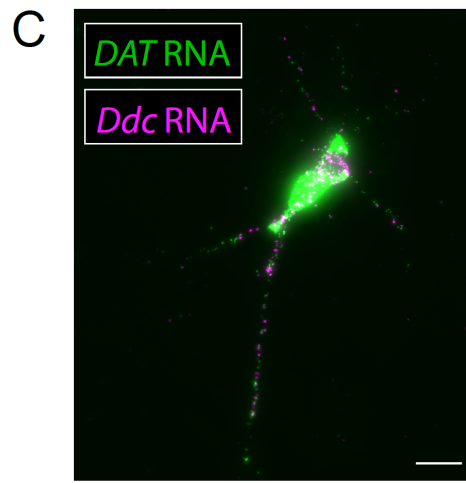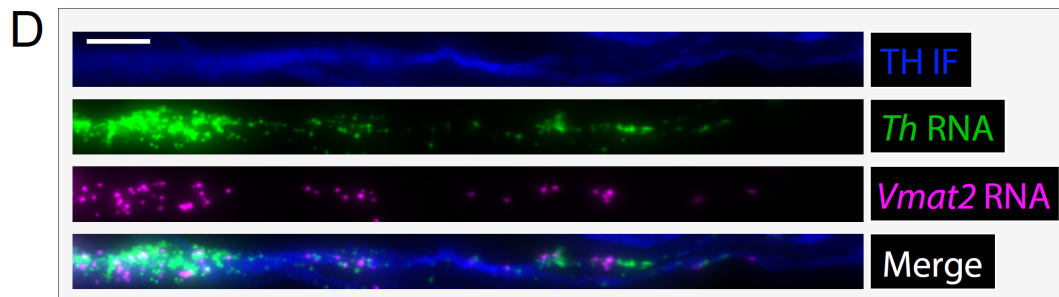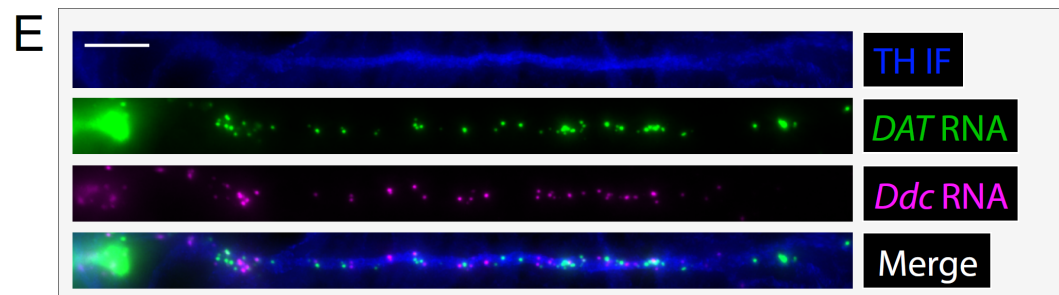

**Figure S7: mRNAs encoding presynaptic proteins are also present in hippocampal dendrites, and dendritic localization of dopaminergic mRNAs in cultured mDA neurons, Related to Figure 6**

**(A)** Volcano plots showing the Cre-dependent log<sub>2</sub> fold change in IP vs. Input (Cre-positive – Cre-negative) for midbrain synaptosomal RiboTag IPs (same as **Figure 6E**) with genes colored by their expression level in the dendrites of four subsets of hippocampal neurons (Perez et al., 2021).

**(B-C)** Multicolor FISH for the indicated dopaminergic mRNAs in cultured mDA neurons. Scale bars, 20 μm.

**(D-E)** TH immunostaining combined with multicolor FISH for the indicated dopaminergic mRNAs in cultured mDA neurons. Straightened dendritic segments are displayed. Scale bars, 10 μm.
